# Supplementary material for: Multifocal Signal Modulation Therapy by Celecoxib: A Strategy for Managing Castration-Resistant Prostate Cancer
Source: MDPI journal article supplement (doi:10.3390/ijms20236091), 2019-12-03
Supplement: s1 [file s1]

Table S1. Celecoxib-controlled gene set (CGS) annotation from Drug Signature DataBase. (<http://tanlab.ucdenver.edu/DSigDB/DSigDBv1.0/>)

| Drug      | Gene | Type                                                                                                                                                                                                                                      | D4-collection database |
|-----------|------|-------------------------------------------------------------------------------------------------------------------------------------------------------------------------------------------------------------------------------------------|------------------------|
| celecoxib | AKT1 | Text_Mining(decreases(response to substance))                                                                                                                                                                                             | CTD                    |
| celecoxib | AKT1 | Text_Mining(affects(cotreatment))                                                                                                                                                                                                         | CTD                    |
| celecoxib | AKT1 | Text_Mining(decreases(phosphorylation))                                                                                                                                                                                                   | CTD                    |
| celecoxib | AKT1 | Text_Mining(increases(phosphorylation))                                                                                                                                                                                                   | CTD                    |
| celecoxib | AKT1 | Text_Mining(decreases(reaction))                                                                                                                                                                                                          | CTD                    |
| celecoxib | AKT1 | Text_Mining(increases(activity))                                                                                                                                                                                                          | CTD                    |
| celecoxib | AKT1 | Text_Mining(decreases(activity))                                                                                                                                                                                                          | CTD                    |
| celecoxib | AKT1 | Text_Mining(decreases(expression))                                                                                                                                                                                                        | CTD                    |
| celecoxib | AR   | Potency-Replicate_1=23.9145(uM)                                                                                                                                                                                                           | D4 PubChem             |
| celecoxib | AR   | Potency-Replicate_1=60.882(uM)                                                                                                                                                                                                            | D4 PubChem             |
| celecoxib | AR   | Potency-Replicate_1=68.5896(uM)                                                                                                                                                                                                           | D4 PubChem             |
| celecoxib | AR   | Potency-Replicate_1=23.9145(uM)                                                                                                                                                                                                           | D4 PubChem             |
| celecoxib | AR   | Potency-Replicate_1=60.882(uM)                                                                                                                                                                                                            | D4 PubChem             |
| celecoxib | AR   | Potency-Replicate_1=68.5896(uM)                                                                                                                                                                                                           | D4 PubChem             |
| celecoxib | AR   | Potency-Replicate_1=23.9145(uM)                                                                                                                                                                                                           | D4 PubChem             |
| celecoxib | AR   | Potency-Replicate_1=60.882(uM)                                                                                                                                                                                                            | D4 PubChem             |
| celecoxib | AR   | Potency-Replicate_1=68.5896(uM)                                                                                                                                                                                                           | D4 PubChem             |
| celecoxib | EGF  | Text_Mining(PMID22456425,PMID24528083,PMID23422093,PMID21882253,PMID24817927,PMID22675459,PMID24357184)                                                                                                                                   | BOSS                   |
| celecoxib | EGFR | Text_Mining(PMID20848776,PMID21246519,PMID23010081,PMID21217396,PMID24073313,PMID24085777,PMID23749165,PMID23749165,PMID24490043,PMID24490137,PMID21268125,PMID22828609,PMID20585313,PMID20035770,PMID24149137,PMID22252523,PMID22675459) | BOSS                   |

|           |        |                                                                                                                                                                          |      |
|-----------|--------|--------------------------------------------------------------------------------------------------------------------------------------------------------------------------|------|
| celecoxib | ERBB2  | Text_Mining(PMID20103725,PMID20480225,PMID20179229,PMID21384185,PMID23578727)                                                                                            | BOSS |
| celecoxib | GSK3B  | Text_Mining(decreases(phosphorylation))                                                                                                                                  | CTD  |
| celecoxib | GSK3B  | Text_Mining(decreases(reaction))                                                                                                                                         | CTD  |
| celecoxib | GSK3B  | Text_Mining(increases(expression))                                                                                                                                       | CTD  |
| celecoxib | MAPK14 | Text_Mining(affects(cotreatment))                                                                                                                                        | CTD  |
| celecoxib | MAPK14 | Text_Mining(increases(activity))                                                                                                                                         | CTD  |
| celecoxib | MCL1   | Text_Mining(PMID19665451,PMID21868575,PMID23001726,PMID21345578,PMID23524145,PMID20836993,PMID24637636,PMID24156425,PMID22343223,PMID22504904,PMID24855827,PMID22716247) | BOSS |

| Legend     |                                                                                                    |
|------------|----------------------------------------------------------------------------------------------------|
| Collection | Description                                                                                        |
| BOSS       | Text mining approach of drug-gene targets using Biomedical Object Search System                    |
| CTD        | Curation of targhes from Comparative Toxicogenomic Database                                        |
| TTD        | Manual curation targets from the Terapeutics targets Database                                      |
| D4 PubChem | Drug signature extracted from literatures                                                          |
| D4 ChEMBL  | Open Data database containing binding and functional information for drug-like bioactive compounds |
| PMID       | PubMed IDentifier                                                                                  |
| RED TEXT   | Celecoxib-controlled gene set (CGS)                                                                |
