# Supplementary material for: Multifocal Signal Modulation Therapy by Celecoxib: A Strategy for Managing Castration-Resistant Prostate Cancer
Source: MDPI journal article supplement (doi:10.3390/ijms20236091), 2019-12-03
Supplement: s1 [file s1]

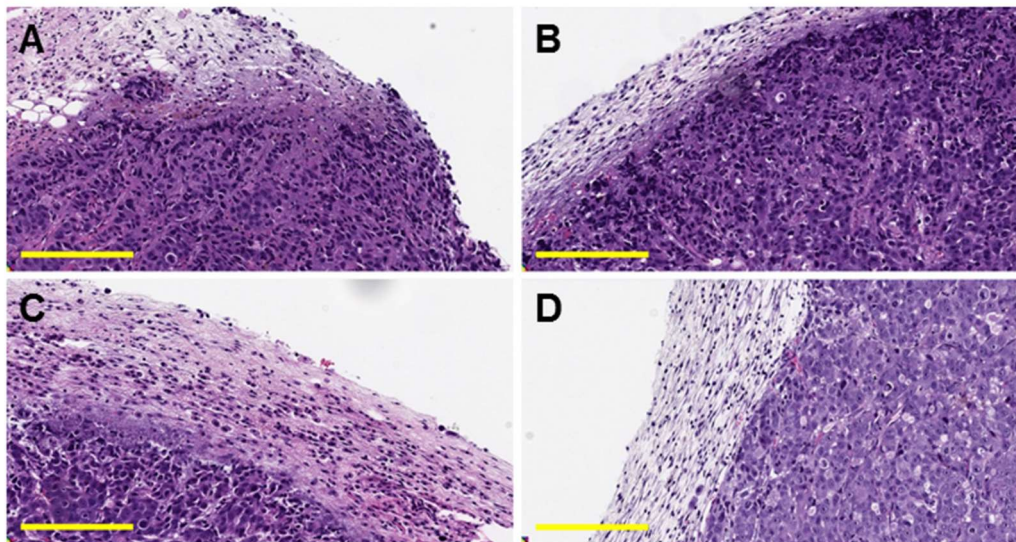

**Supplementary Figure S1. Comparison of xenografts from control and treated animals.** H&E stained tissues from (A) control, (B) celecoxib, (C) cetuximab, (D) celecoxib and cetuximab treated animals, revealed no histological changes indicating no degeneration or necrosis in all the treated groups. (Light microscope 20x; scale bar represents 200 $\mu$ m).

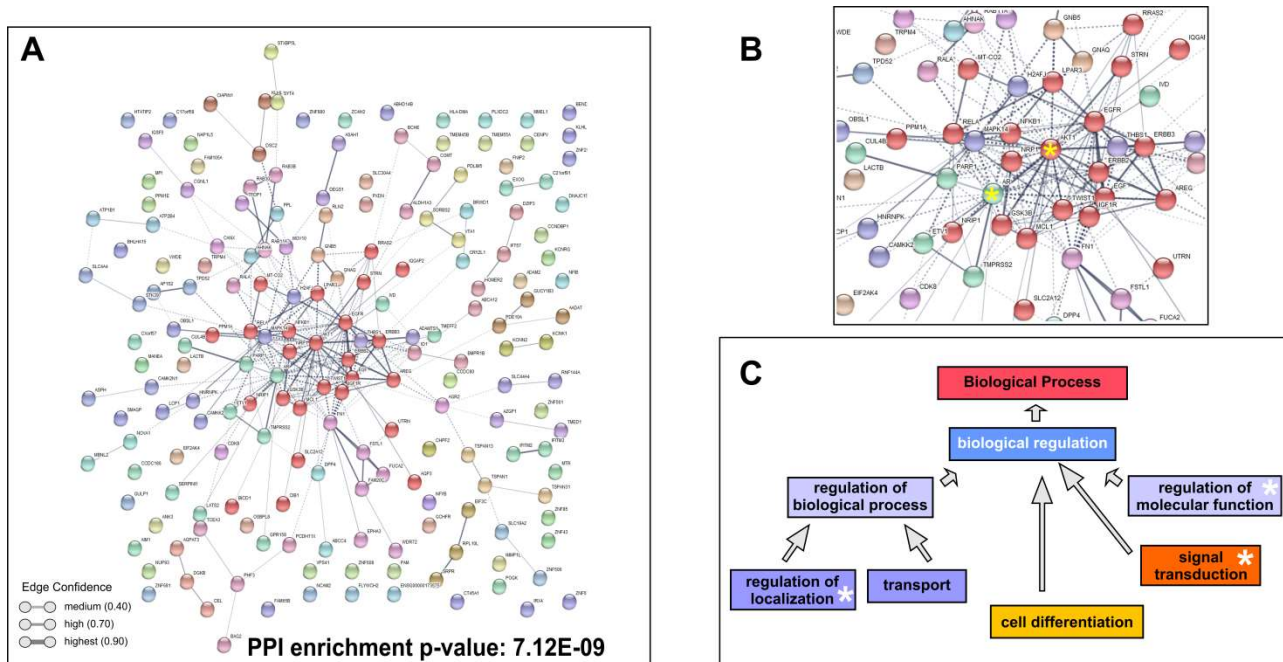

**Supplementary Figure S2. Bioinformatics analyses.** (A) STRING protein–protein interaction (PPI) network of genes and proteins differentially expressed in PDB and MDB compared to LNCaP and integrated with CGS. Markov Clustering algorithm (inflation parameter 3) was used. Line thickness indicates the strength of data (confidence). (B) Detailed view of *a* showing AR and AKT1, highlighted by asterisks, interactions. (C) Directed Acyclic Graph (DAG) visualization for the top ten highly enriched GO-BP in differentially expressed genes and proteins in PDB, MDB and CGS based on information retrieved from QuickGO. White asterisk, common GO-BP.

**Table S2 .** List of primer sequences used for quantitative real-time reverse transcription-PCR analysis

| Gene name     | Primer sequence (5' – 3') |                         |
|---------------|---------------------------|-------------------------|
| <i>AR</i>     | sense                     | TGTCCATCTTGTCGTCTTC     |
|               | antisense                 | GAAGCCTCTCCTTCCTCCTG    |
| <i>EGFR</i>   | sense                     | ACTGCTGCCACAACCAGTG     |
|               | antisense                 | GCCTTCGTCTCGGAATTTG     |
| <i>AREG</i>   | sense                     | GCCTTTATGTCTGCTGTGAT    |
|               | antisense                 | TCGAAGTTTCTTTCGTTTCCTCA |
| <i>EGF</i>    | sense                     | GATTTGTTCTGCTTCCTGATGG  |
|               | antisense                 | TCTCTCAAGCACTGAGCCTT    |
| <i>HNRNPK</i> | sense                     | AATCTGATGCTGTGGAATGCTT  |
|               | antisense                 | ACCCAATAATTCCTCCTGCTA   |
| <i>18S</i>    | sense                     | ACACGGACAGGATTGACAGATT  |
|               | antisense                 | AGACAAATCGCTCCACCAACTA  |

**Table S3 .** List of the antibodies used for WB

| <b>Antigen</b>                         | <b>Type</b> | <b>Label</b> | <b>Host</b> | <b>Company</b>                              | <b>Dilution</b> |
|----------------------------------------|-------------|--------------|-------------|---------------------------------------------|-----------------|
| Phospho-AKT<br>(Ser473)                | Polyclonal  |              | Rabbit      | Cell Signaling<br>Technology (CST<br>#9271) | 1:1000          |
| AKT                                    | Polyclonal  |              | Rabbit      | CST #9272                                   | 1:1000          |
| AR                                     | Monoclonal  |              | Mouse       | DAKO M3562                                  | 1:600           |
| β-actin HPR                            | Polyclonal  |              | Rabbit      | CST #4970                                   | 1:4000          |
| EGFR                                   | Polyclonal  |              | Rabbit      | CTS #4267                                   | 1:1000          |
| ErbB2                                  | Polyclonal  |              | Rabbit      | Santa Cruz sc-284                           | 1:1000          |
| ErbB3                                  | Polyclonal  |              | Rabbit      | CTS #12708                                  | 1:1000          |
| MCL-1                                  | Polyclonal  |              | Rabbit      | Bioworld BS1220                             | 1:1000          |
| Cox2                                   | Polyclonal  |              | Rabbit      | CTS #12282                                  | 1:1000          |
| PARP1                                  | Polyclonal  |              | Rabbit      | CST #9542                                   | 1:1000          |
| Pospho-GSK-3β<br>(Ser9)                | Polyclonal  |              | Rabbit      | CTS #9323                                   | 1:1000          |
| Pospho –p38<br>MAPK<br>(Thr180/Tyr182) | Polyclonal  |              | Rabbit      | CTS #9211                                   | 1:1000          |
| α-Tubulin                              | Monoclonal  |              | Mouse       | SIGMA T6074                                 | 1:4000          |
| Mouse Ig G                             | Polyclonal  | Peroxidase   | Rabbit      | CTS #7076                                   | 1:2000          |
| Rabbit Ig G                            | Polyclonal  | Peroxidase   | Goat        | CTS #7074                                   | 1:2000          |
